# Supplementary material for: Direct evidence that tumor cells soften when navigating confined spaces
Source: PubMed Central journal article supplement — Mol Biol Cell. 2020 Jul 21;31(16):1726–34. doi: 10.1091/mbc.E19-10-0588 (PMC7521845; doi:10.1091/mbc.e19-10-0588), 2020-07-21
Supplement: mbc-31-1726-s001.pdf [file mbc-31-1726-s001.pdf]

# Supplemental Materials

*Molecular Biology of the Cell*

Rianna et al.

## Supplementary Figures

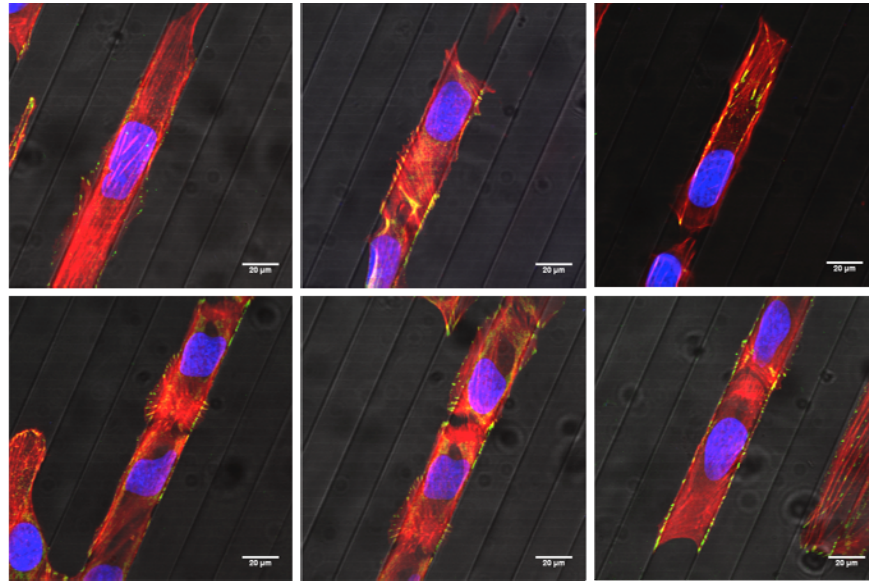

**Figure S1.** Confinement of U2OS cells within 20  $\mu\text{m}$  PDMS channels. Confocal images of several U2OS cells on 20  $\mu\text{m}$  spaced channels of PDMS, seeded on different locations. Cells are fixed after 24 h from cell seeding and stained for actin (red), vinculin (green) and nuclei (blue).

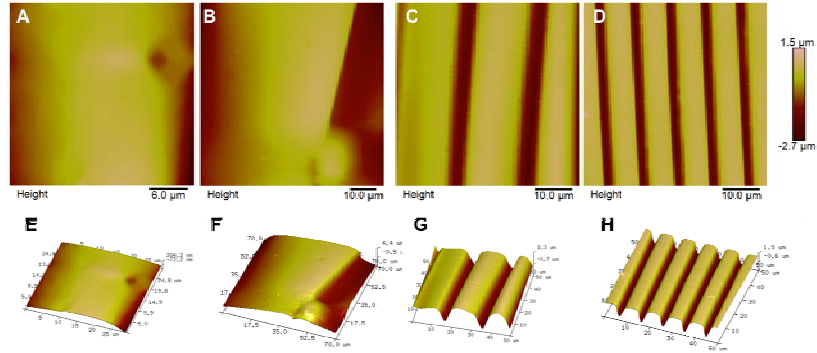

**Figure S2.** AFM images of PDMS channels. 2D Contact-mode AFM height images of (A) flat, (B) 50  $\mu\text{m}$ , (C) 10  $\mu\text{m}$  and (D) 5  $\mu\text{m}$  patterned PDMS with (E-H) the respective 3D representations. In panel (B) a U2OS cell is seen adjacent to the channel wall.

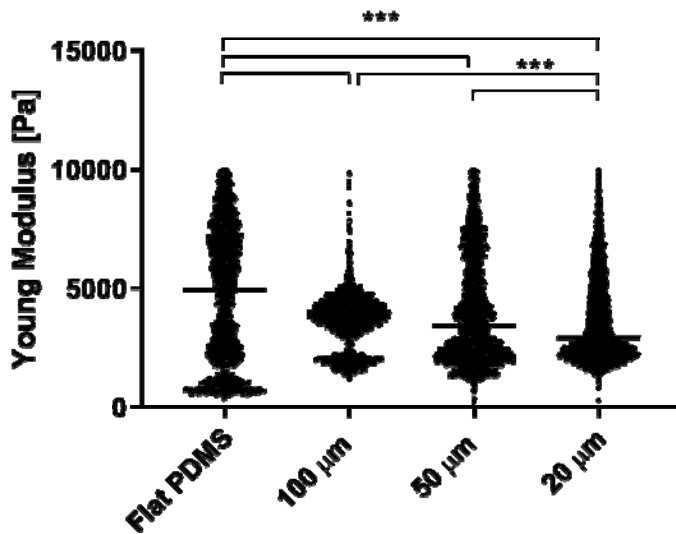

**Figure S3.** Dot plot graph of AFM U2OS cell mechanics. Young's modulus values of U2OS cells seeded on flat PDMS and 20-100  $\mu\text{m}$  wide channels (see Figure 2D of the main text). Statistical significance was determined using the Mann-Whitney test between each pair of categories (\*\*\*)  $p < 0.0001$ ,  $N=2560$ , 2304, 3072, 3328 force curves on 10, 9, 12, 13 cells across three independent experiments. For each cell one 16x16 map was recorded on the supranuclear region of cell body).

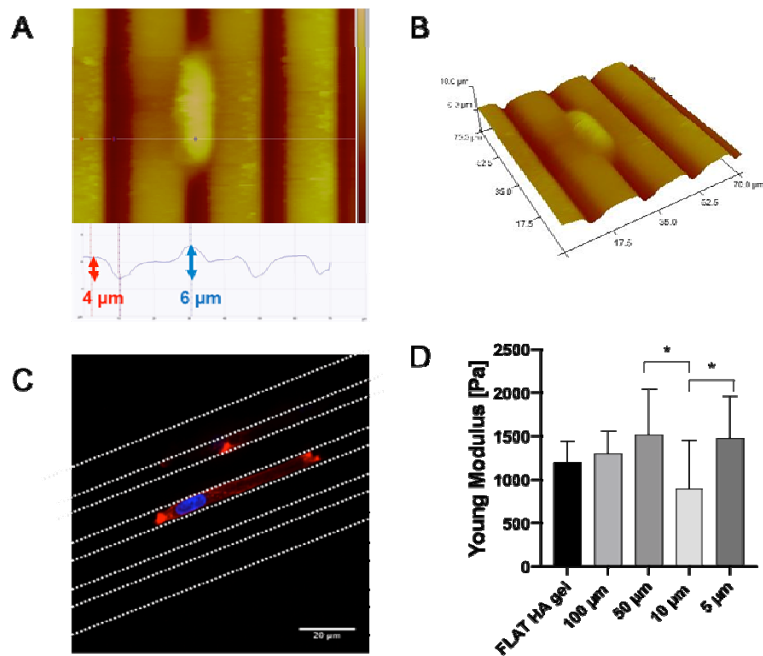

**Figure S4.** Confinement of U87 glioblastoma cells within channels of hyaluronic acid (HA) gels. (A) AFM image of a U87 cell confined in 10  $\mu\text{m}$  HA gel channels (gel stiffness: 14 kPa) with a cross section below showing the height of the channel and the cell, 4  $\mu\text{m}$  and 6  $\mu\text{m}$ , respectively. (B) AFM 3D image of U87 cell. (C) Confocal image of U87 cells within 10  $\mu\text{m}$  channels; cells were stained for actin (red) and nuclei (blue); channels are represented with white dashed lines. (D) Young's modulus values of U87 cells seeded on flat HA gels and on HA channels ranging from 100  $\mu\text{m}$  to 5  $\mu\text{m}$ . Each bar represents the median value of all the values extracted from all the force maps collected on cells with interquartile range (10-15 cells were measured for each category, with 256 force curves recorded on each cell, for a total of ~3850 total curves,  $*p < 0.05$ , as calculated by Mann-Whitney test between each pair of categories).

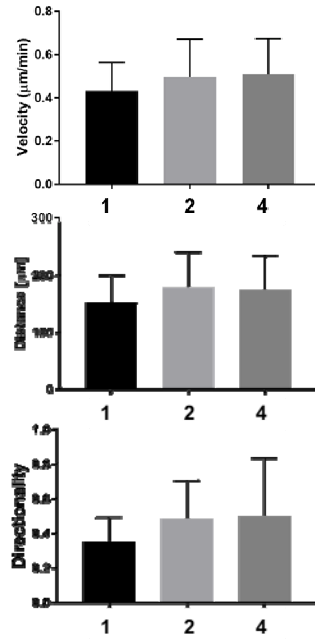

**Figure S5.** Cell migration study on U2OS cells on Y-shaped PDMS channels. U2OS were observed for 12 h with optical microscope, recording one image every 15 minutes. Manual tracking and chemotaxis tools of *ImageJ* were used for studying cell migratory properties, in terms of velocity, distance and directionality. The numbers 1, 2 and 4 on x-axis represent the categories in which cells were sorted: (1) Unconfined; (2) Attached to one wall; and (4) fully confined within channels (as showed in Figure 3 of the main text). We could not measure cells of category 3 (Associated with two walls but not fully confined), because this was a temporary condition of transition between unconfined and confined states and therefore did not allow measurement within a 12 h window.

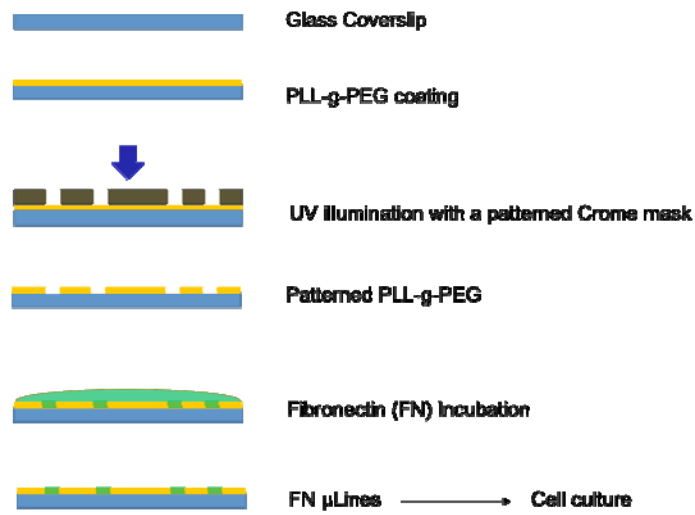

**Figure S6.** Schematic of microline fabrication. From top to bottom: a cover glass was coated with PLL-g-PEG for 1 h and then treated with 180 nm UV through a quartz-chrome mask with microline patterns. FN solution was then absorbed to the exposed parts of layer of PLL, at which stage the cover glass was used in cell culture.

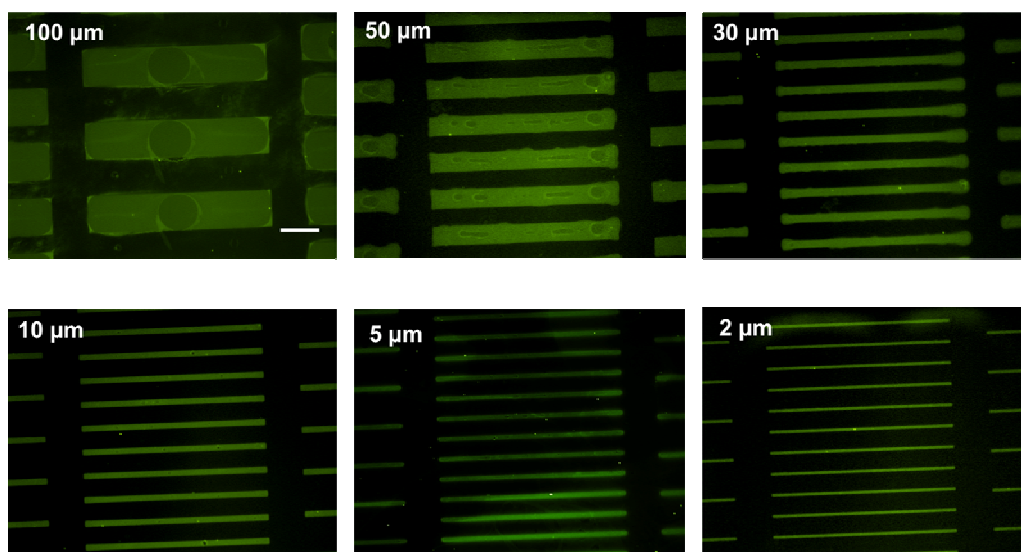

**Figure S7.** FNmicrolines on PLL-g-PEG coated cover slip. Optical images of fluorescently labeled FN on photopatterned microlines. Line width ranges from 100  $\mu\text{m}$  to 2  $\mu\text{m}$ . Scale bar: 100  $\mu\text{m}$ .

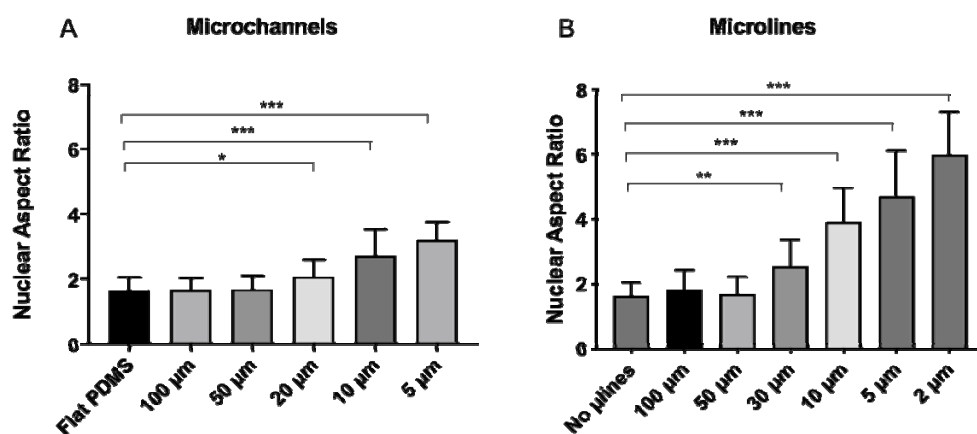

**Figure S8.** Quantification of nuclear aspect ratio on U2OS cells seeded on (A) topographical microchannels and (B) FN microlines. All error bars depict standard deviations ( $n=10$  across three independent experiments,  $***p<0.0001$ ,  $**p<0.001$ ,  $*p<0.01$ , as calculated by Mann-Whitney test between each pair of categories).

## **Movie Legends**

**Movie S1.** Time-lapse movie of U2OS cells migrating within Y-shaped PDMS channels. Confined migration was achieved passivating the mesas between the channels by microcontact-printing PEG prior to fibronectin-coating the device. Cells were observed for 12 h with optical microscope, recording one image every 15 minutes.

**Movie S2.** U2OS cell migration within Y-shaped PDMS channels. A U2OS cell is seen migrating into the central channel of the device, going from unconfined to confined spaces. Cells were observed for 12 h with optical microscope, recording one image every 15 minutes.

**Movie S3.** Confocal z-stack movie of a U2OS cell confined in channels. Staining is for actin (red); vinculin (green) and nuclei (blue). Movie starts at the bottom of the cell and ends at the top.

**Movie S4.** Confocal z-stack movie of a U2OS cell confined in channels. Staining is for actin (red); vinculin (green) and nuclei (blue). Movie starts at the bottom of the cell and ends at the top.
